# Supplementary material
Source: Springer Nature journal article supplement (https://www.springermedizin.de/resource/supplementary/12936_2009_1001_MOESM4_ESM.pdf/9548752)

Parasites

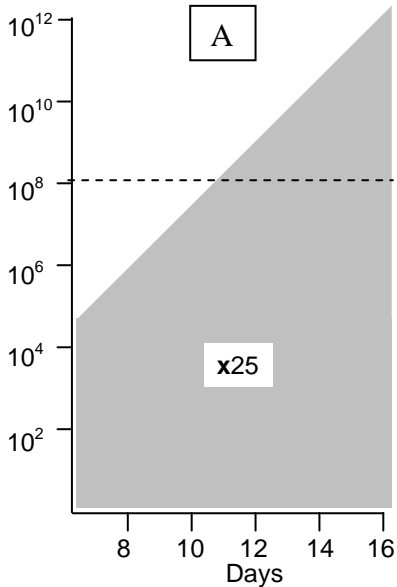

Parasites

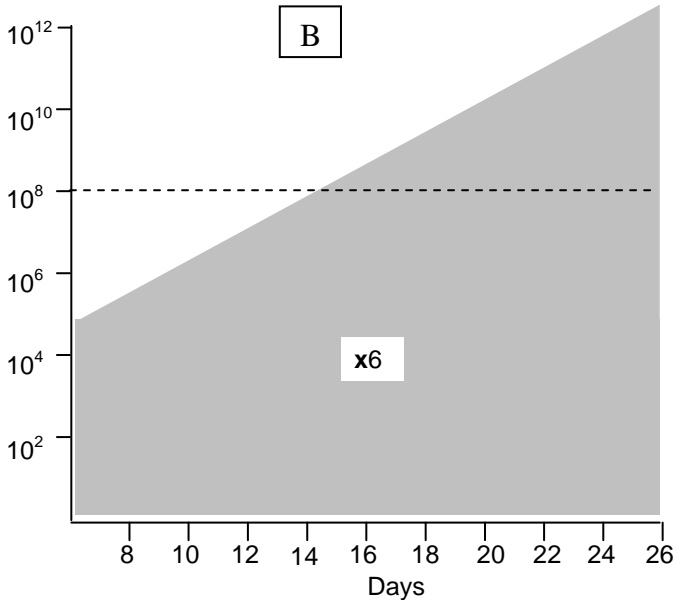

Supplement: MOESM4 [file 9548752]
